# Supplementary material
Source: HighWire-hosted journal article supplement (https://www.cfp.ca/highwire/filestream/34512/field_highwire_adjunct_files/5/e194_Appendix_6_Origins_of_RCTs_in_Meta-analyses.pdf)
Supplement: e194_Appendix_6_Origins_of_RCTs_in_Meta-analyses.pdf [file e194_Appendix_6_Origins_of_RCTs_in_Meta-analyses.pdf]

Appendix 6. Origins of Randomized, Controlled Trials in Meta-analyses for Umbrella Systematic Review (Figures 1-6)

| <b>Clinical Topic</b> | <b>Outcome</b>           | <b>Total RCTs (Total Patients)</b> | <b>Intervention versus Comparator</b>                  | <b>Systematic Reviews &amp; Meta-Analyses Contributing</b> | <b>Included RCTs</b>                                                                                                                                                                                                     | <b>Associated Figure Number</b> |
|-----------------------|--------------------------|------------------------------------|--------------------------------------------------------|------------------------------------------------------------|--------------------------------------------------------------------------------------------------------------------------------------------------------------------------------------------------------------------------|---------------------------------|
| Primary Care          | Retention in Treatment   | 3 (287)                            | Primary care versus Specialty care-based interventions | Lagisetty 2017                                             | Carrieri 2014, Fiellin 2001, O'Connor 1998                                                                                                                                                                               | 1                               |
| Primary Care          | Street Opioid Abstinence | 3 (313)                            | Primary care versus Specialty care-based interventions | Lagisetty 2017                                             | Carrieri 2014, Fiellin 2001, O'Connor 1998                                                                                                                                                                               | 2                               |
|                       |                          |                                    |                                                        |                                                            |                                                                                                                                                                                                                          |                                 |
| Buprenorphine         | Retention in Treatment   | 5 (1671)                           | Buprenorphine + Naloxone versus Methadone              | Mattick 2014                                               | Kamien 2008 (Kamien 2008h), Neumann 2013*, Piralishvili 2015*, Potter 2013*                                                                                                                                              | 3                               |
| Buprenorphine         | Retention in Treatment   | 19 (2157)                          | Buprenorphine alone versus Methadone                   | Mattick 2014                                               | Ahmadi 2003a, Fischer 1999, Johnson 1992, Johnson 2000, Kosten 1993, Kristensen 2005, Ling 1996, Lintzeris 2005, Mattick 2003, Neri 2005, Oliveto 1999, Pani 2000, Petitjean 2001, Schottenfeld 1997 (Schottenfeld 1997, | 3                               |

|               |                                       |              |                                                                              |                                              |                                                                                                                                                                                                                                                                                                                            |   |
|---------------|---------------------------------------|--------------|------------------------------------------------------------------------------|----------------------------------------------|----------------------------------------------------------------------------------------------------------------------------------------------------------------------------------------------------------------------------------------------------------------------------------------------------------------------------|---|
|               |                                       |              |                                                                              |                                              | Schottenfeld 1997m),<br>Schottenfeld 2005, Soyka<br>2008a, Strain 1994 (Strain<br>1994a, Strain 1994b)                                                                                                                                                                                                                     |   |
| Buprenorphine | Abstinent as<br>per Negative<br>Urine | 6 (566)      | Buprenorphine<br>+ Naloxone or<br>buprenorphine<br>alone versus<br>Methadone | Mattick 2014                                 | Johnson 2000, Kamien 2008<br>(Kamien 2008, Kamien<br>2008h), Neri 2005,<br>Neumann 2013*, Pani 2000                                                                                                                                                                                                                        | 4 |
| Buprenorphine | Abstinent as<br>per Self<br>Report    | 2 (1185)     | Buprenorphine<br>+ Naloxone<br>versus<br>Methadone                           | Mattick 2014                                 | Neumann 2013*, Potter<br>2013*                                                                                                                                                                                                                                                                                             | 4 |
|               |                                       |              |                                                                              |                                              |                                                                                                                                                                                                                                                                                                                            |   |
| Psychosocial  | Retention in<br>Treatment             | 3 (450)      | Standard<br>Counseling vs<br>Minimal to no<br>Counseling                     | Amato 2011,<br>Dugosh 2016                   | <b>Amato 2011:</b> Chawarski<br>2011<br><b>Dugosh 2016:</b> Gu 2013<br>Liu 2018*                                                                                                                                                                                                                                           | 5 |
| Psychosocial  | Retention in<br>Treatment             | 19<br>(2251) | Prize or<br>Voucher<br>Contingencies<br>versus usual<br>care                 | Ainscough 2017,<br>Amato 2011, Davis<br>2016 | <b>Ainscough 2017:</b> Chutuape<br>1999, Ling 2013, Peirce<br>2006, Petry 2002, Petry<br>2007, Preston 2000<br><b>Amato 2011:</b> Bickel 2008,<br>Chopra 2009, Gross 2006,<br>Oliveto 2005, Petry 2005,<br><b>Davis 2016:</b> Chen 2013,<br>Defulio 2012, Dunn 2013,<br>Everly 2011, Hser 2011,<br>Jiang 2012, Kidorf 2013 | 6 |

|              |                        |         |                                         |                            |                                                                                                                                              |   |
|--------------|------------------------|---------|-----------------------------------------|----------------------------|----------------------------------------------------------------------------------------------------------------------------------------------|---|
| Psychosocial | Retention in Treatment | 7 (338) | Medical Contingencies versus usual care | Amato 2011, Ainscough 2017 | <b>Amato 2011:</b> Chopra 2009, Gross 2006, Silverman 2004, Stitzer 1992<br><b>Ainscough 2017:</b> Chutuape 1999, Chutuape 2001, Kidorf 1996 | 6 |
|--------------|------------------------|---------|-----------------------------------------|----------------------------|----------------------------------------------------------------------------------------------------------------------------------------------|---|

\* Study identified from RCT search.

\*\* Study identified through grey literature search.
